# Supplementary material for: Calcium Chloride Treatment Enhances Antigen Production in Foot-and-Mouth Disease Vaccines for Serotypes SAT1 and SAT3
Source: MDPI journal article supplement (doi:10.3390/vaccines12030231), 2024-02-23
Supplement: s1 [file s1]

**Table S1. Comparison of SAT1 BOT virial titer and antigen productivity at various CaCl<sub>2</sub> concentration.** BHK-21 suspension cells were treated with 30, 10, 3, 1 mM CaCl<sub>2</sub> simultaneously with 0.01 MOI of SAT1 BOT infection and cultured for 24 h at 37°C. The virial titer and antigen productivity were measured by virus titration and SE-HPLC.

| Concentration of supplement (mM) | Viral titer (log TCID <sub>50</sub> /mL) | 146S concentration (µg/mL) |
|----------------------------------|------------------------------------------|----------------------------|
| 0                                | 5.73 ± 0.31                              | 0                          |
| 1                                | 9.10 ± 0.20                              | 6.87 ± 0.47                |
| 3                                | 8.97 ± 0.42                              | 8.13 ± 0.80                |
| 10                               | 5.97 ± 0.23                              | 4.03 ± 0.26                |
| 30                               | 5.43 ± 0.12                              | 2.79 ± 0.31                |

**Table S2. Comparison of SAT3 ZIM virial titer and antigen productivity at various CaCl<sub>2</sub> concentration.** BHK-21 suspension cells were treated with 30, 10, 3, 1 mM CaCl<sub>2</sub> simultaneously with 0.01 MOI of SAT3 ZIM infection and cultured for 24 h at 37°C. The virial titer and antigen productivity were measured by virus titration and SE-HPLC.

| Concentration of supplement (mM) | Viral titer (log TCID <sub>50</sub> /mL) | 146S concentration (µg/mL) |
|----------------------------------|------------------------------------------|----------------------------|
| 0                                | 7.93 ± 0.12                              | 1.50 ± 0.26                |
| 1                                | 9.23 ± 0.12                              | 5.14 ± 0.56                |
| 3                                | 9.90 ± 0.20                              | 6.89 ± 0.38                |
| 10                               | 8.90 ± 0                                 | 4.69 ± 0.47                |
| 30                               | 8.63 ± 0.31                              | 3.15 ± 0.18                |

**Table S3. Production efficiency of SAT1 BOT antigen according to the timing of CaCl<sub>2</sub> addition.** The BHK-21 suspension cells were treated with 3 mM calcium chloride at the time of 2 h before FMDV infection, FMDV infection, 2 h post-infection, and 24 h post-infection. The cells were infected with SAT1 BOT FMDV at 0.01 MOI and cultured for 24 h. The culture supernatant was collected 24 h post-virus infection, and the virus titer and antigen productivity were determined by virus titration and SE-HPLC.

| Treatment time post infection (h) | Viral titer (log TCID <sub>50</sub> /mL) | 146S concentration (µg/mL) |
|-----------------------------------|------------------------------------------|----------------------------|
| No treatment                      | 5.77 ± 0.12                              | 0                          |
| -2                                | 8.70 ± 0.20                              | 9.17 ± 0.31                |
| 0                                 | 7.97 ± 0.12                              | 9.84 ± 0.38                |
| 2                                 | 7.97 ± 0.23                              | 8.50 ± 1.05                |
| 24                                | 5.97 ± 0.12                              | 0                          |

**Table S4. Production efficiency of SAT3 ZIM antigen according to the timing of CaCl<sub>2</sub> addition.** The BHK-21 suspension cells were treated with 3 mM calcium chloride at the time of 2 h before FMDV infection, FMD virus infection, 2 h post-infection, and 24 h post-infection. The cells were infected with SAT3 ZIM FMDV at 0.01 MOI and cultured for 24 h. The culture supernatant was collected 24 h post-virus infection, and the virus titer and antigen productivity were determined by virus titration and SE-HPLC.

| Treatment time post infection (h) | Viral titer (log TCID <sub>50</sub> /mL) | 146S concentration (µg/mL) |
|-----------------------------------|------------------------------------------|----------------------------|
| No treatment                      | 5.90 ± 0.20                              | 1.91 ± 0.34                |
| -2                                | 8.30 ± 0.00                              | 9.61 ± 0.70                |
| 0                                 | 8.30 ± 0.20                              | 9.15 ± 0.48                |
| 2                                 | 7.97 ± 0.31                              | 8.19 ± 0.06                |
| 24                                | 6.50 ± 0.20                              | 2.17 ± 0.18                |

**Table S5. Effect of CaCl<sub>2</sub> addition on SAT1 BOT virus titer and antigen production in CD-BHK, Provero-1, and Cellvento medium.** 3 mM calcium chloride was added at 0 h post-infection of SAT1 BOT in the 30 mL of CD-BHK, Provero-1, and Cellvento medium. The culture supernatant was collected 24 h post-virus infection, and the virus titer and antigen productivity were determined by virus titration and SE-HPLC.

| Production media | Viral titer (log TCID <sub>50</sub> /mL) |                        | 146S concentration (µg/mL) |                        |
|------------------|------------------------------------------|------------------------|----------------------------|------------------------|
|                  | NC                                       | 3 mM CaCl <sub>2</sub> | NC                         | 3 mM CaCl <sub>2</sub> |
| CD-BHK           | 5.73 ± 0.31                              | 9.50 ± 0.00            | 0                          | 4.33 ± 0.38            |
| Provero-1        | 6.67 ± 0.25                              | 7.83 ± 0.06            | 0.64 ± 0.08                | 0.96 ± 0.08            |
| Cellvento        | 5.50 ± 0.17                              | 6.60 ± 0.10            | 0                          | 0                      |

**Table S6. Effect of CaCl<sub>2</sub> addition on SAT3 ZIM virus titer and antigen production in CD-BHK, Provero-1, and Cellvento medium.** 3 mM calcium chloride was added at 0 h post-infection of SAT3 ZIM in the 30 mL of CD-BHK, Provero-1, and Cellvento medium. The culture supernatant was collected 24 h post-virus infection, and the virus titer and antigen productivity were determined by virus titration and SE-HPLC.

| Production media | Viral titer (log TCID <sub>50</sub> /mL) |                        | 146S concentration (µg/mL) |                        |
|------------------|------------------------------------------|------------------------|----------------------------|------------------------|
|                  | NC                                       | 3 mM CaCl <sub>2</sub> | NC                         | 3 mM CaCl <sub>2</sub> |
| CD-BHK           | 7.93 ± 0.12                              | 9.50 ± 0.00            | 0                          | 3.50 ± 0.18            |
| Provero-1        | 6.83 ± 0.06                              | 8.20 ± 0.20            | 0.54 ± 0.15                | 0.84 ± 0.15            |
| Cellvento        | 6.03 ± 0.15                              | 7.00 ± 0.10            | 0.76 ± 0.09                | 1.25 ± 0.12            |
